# Supplementary material
Source: PubMed Central journal article supplement (PMC5014121)

# Supplementary Figure 1

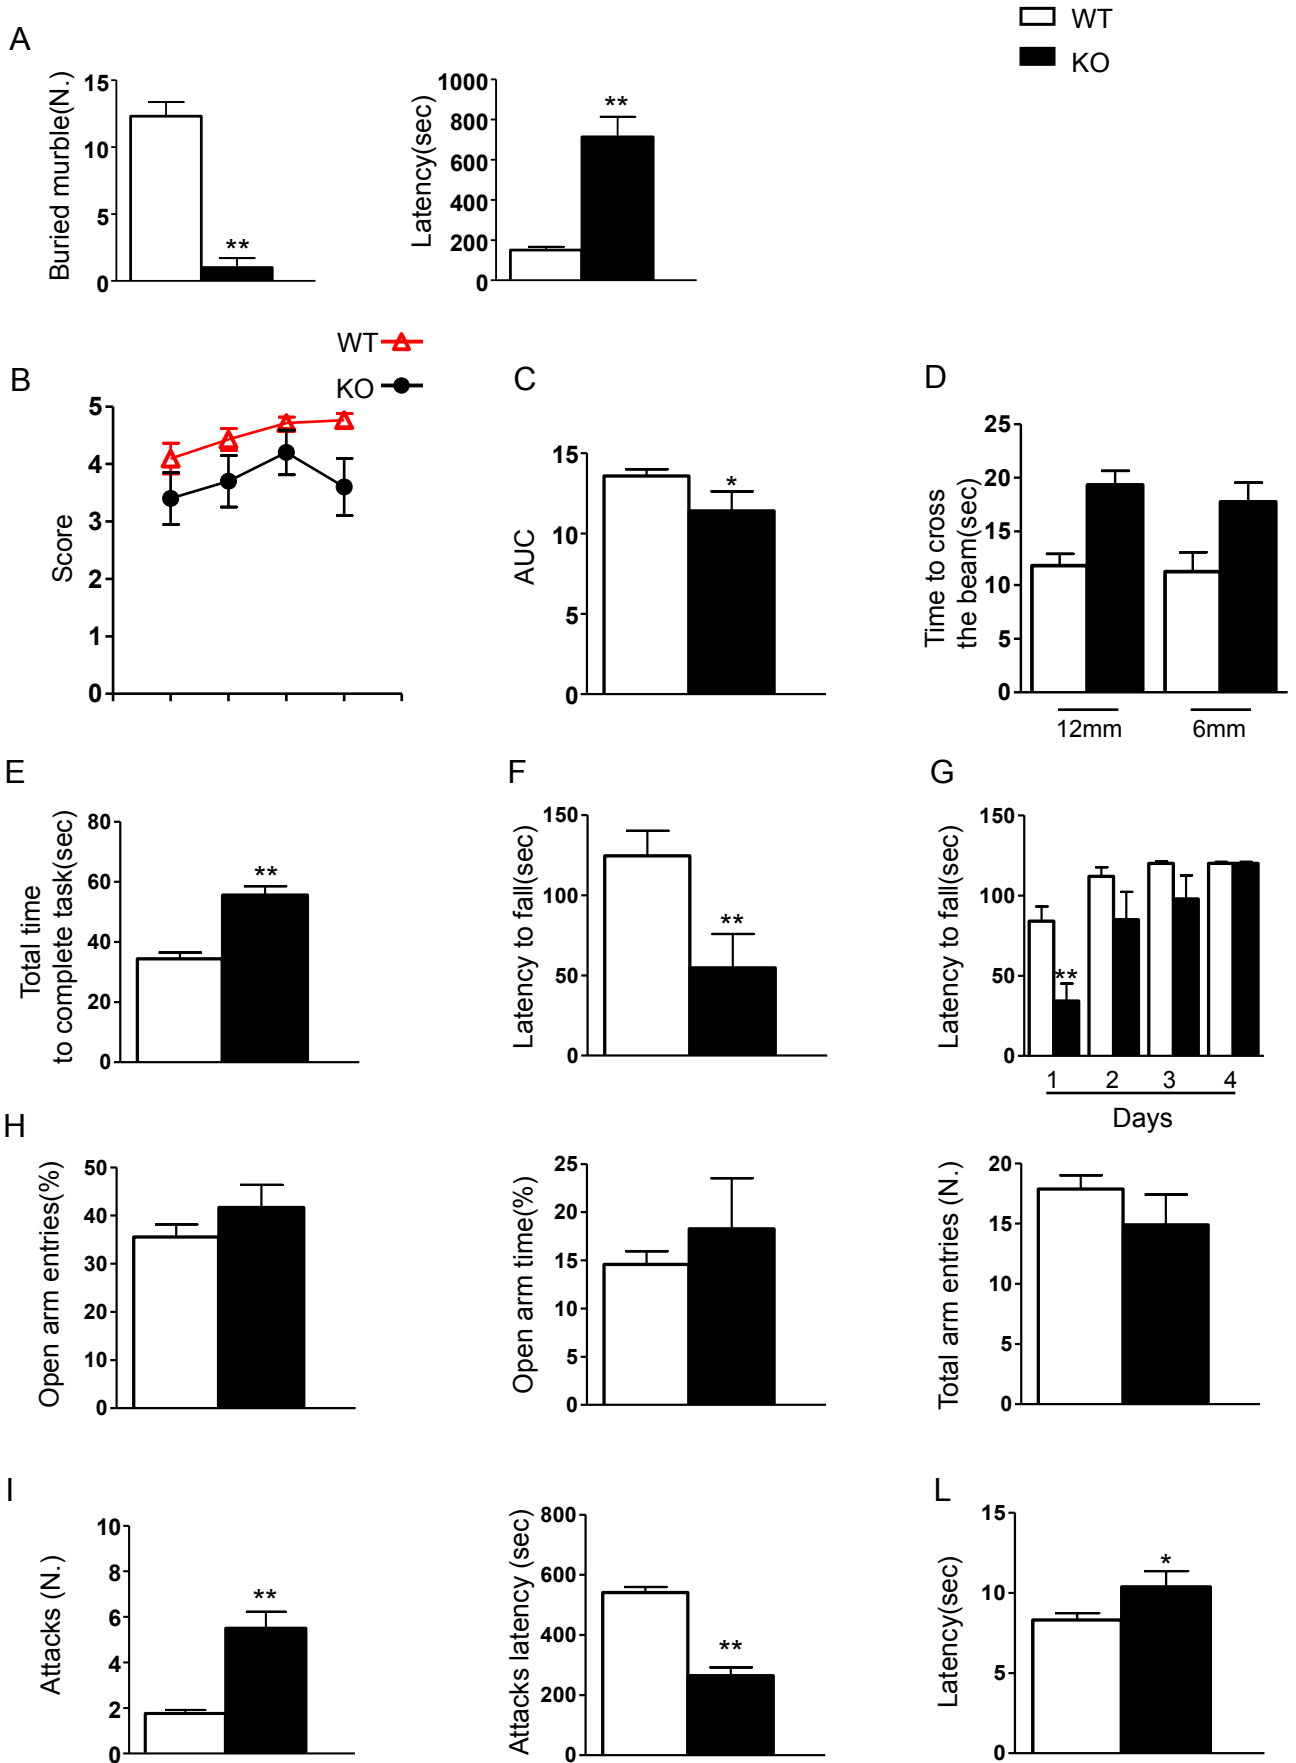

Supplement: NIHMS66921-supplement-SupFig1.pdf [file NIHMS66921-supplement-SupFig1.pdf]

# Supplementary Figure 2

**A**

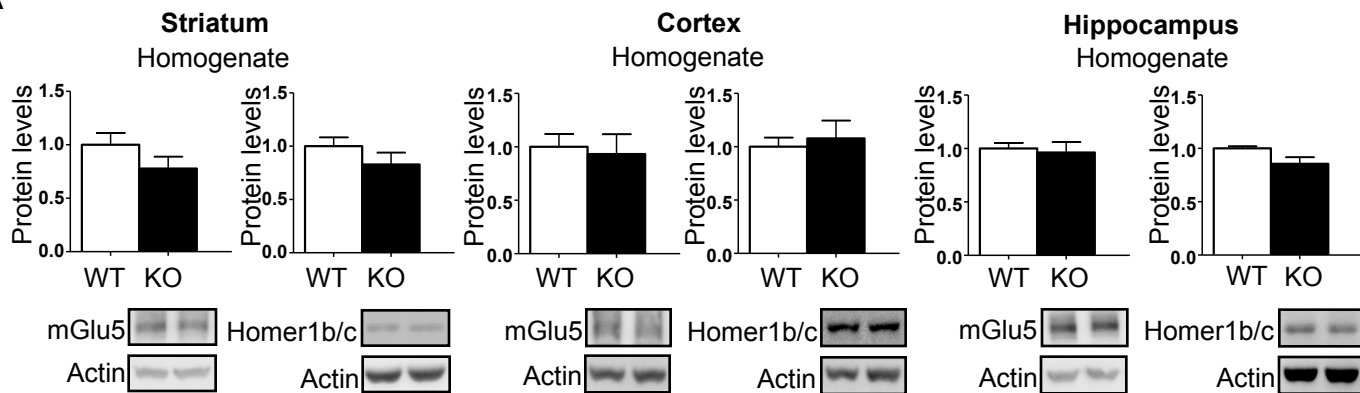

**B**

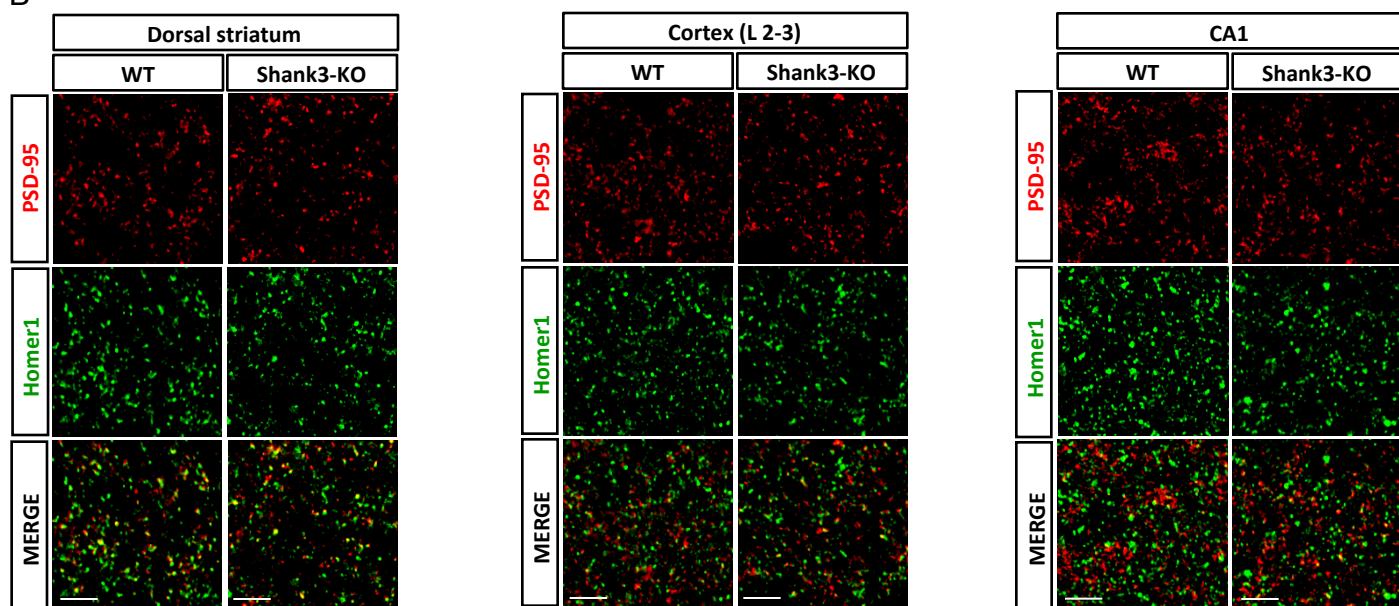

**C**

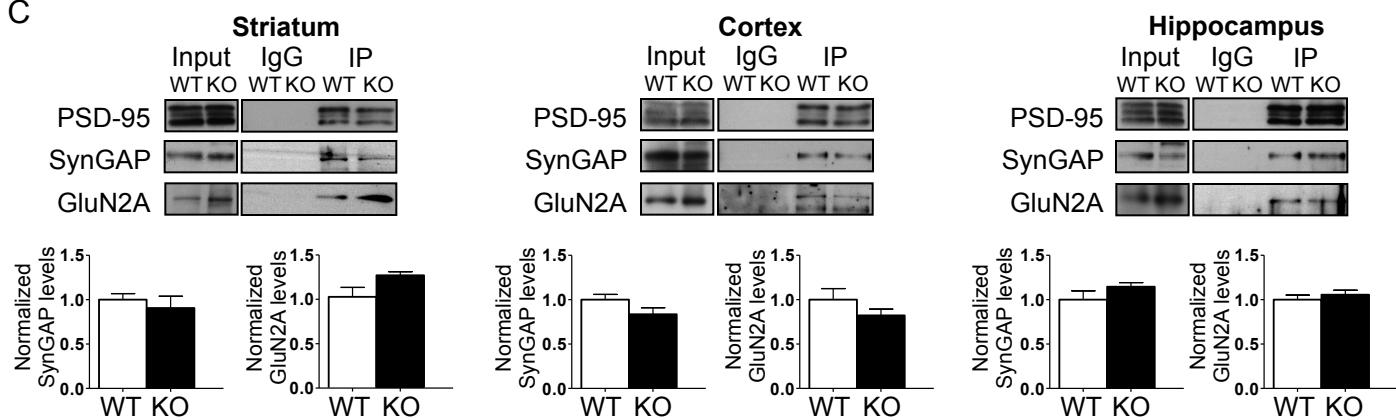

**D**

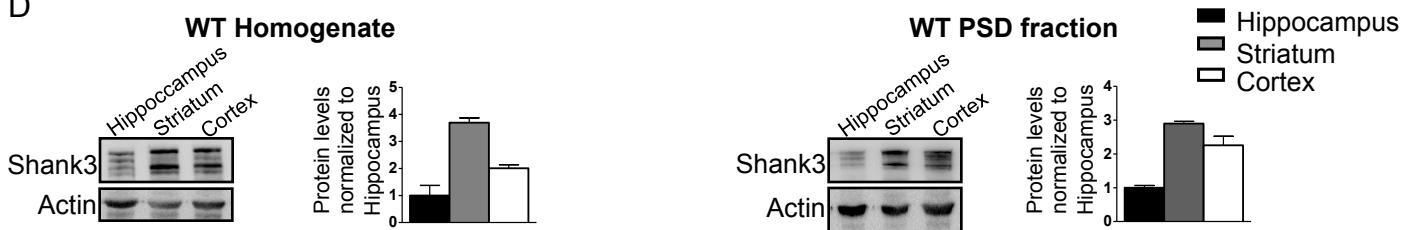

Supplement: NIHMS66921-supplement-SupFig2.pdf [file NIHMS66921-supplement-SupFig2.pdf]

# Supplementary Figure 3

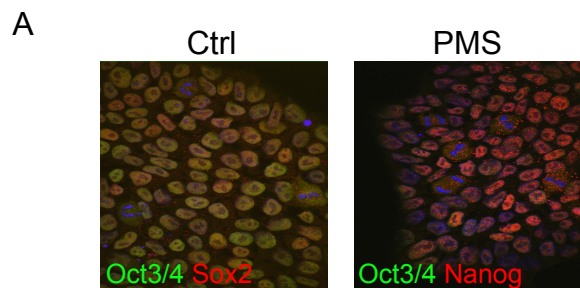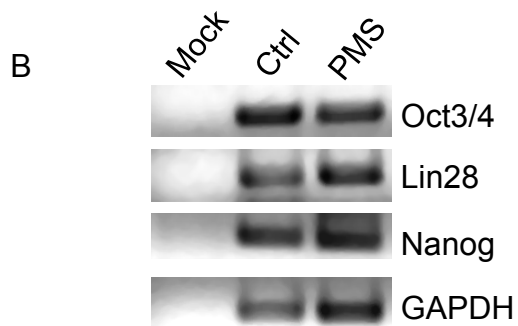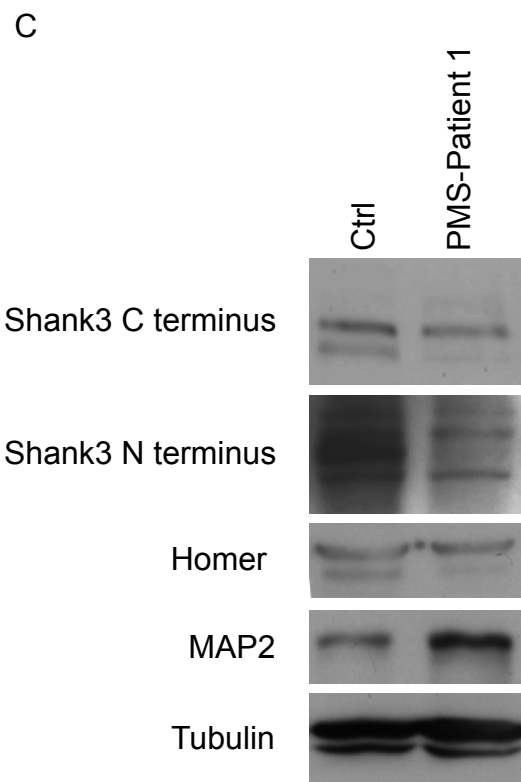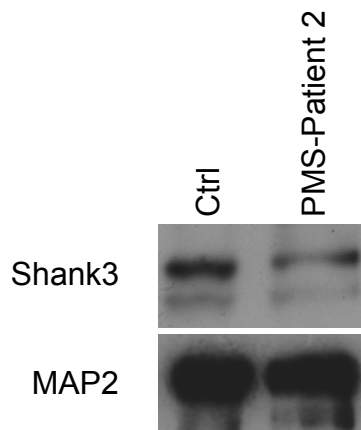

Supplement: NIHMS66921-supplement-SupFig3.pdf [file NIHMS66921-supplement-SupFig3.pdf]

Supplementary Figure 4

A

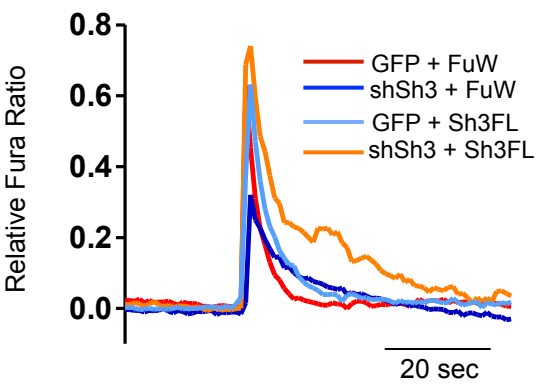

B

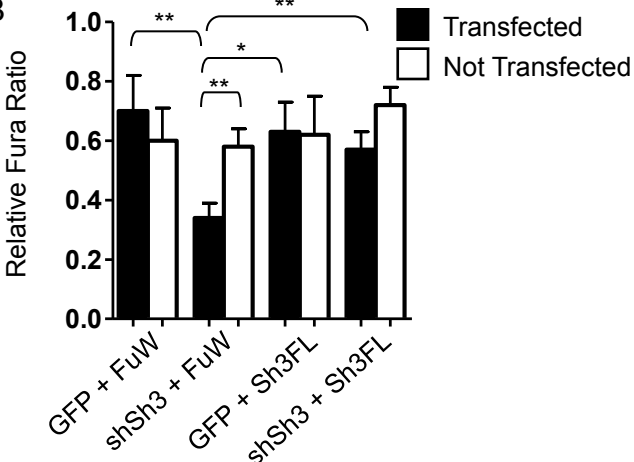

C

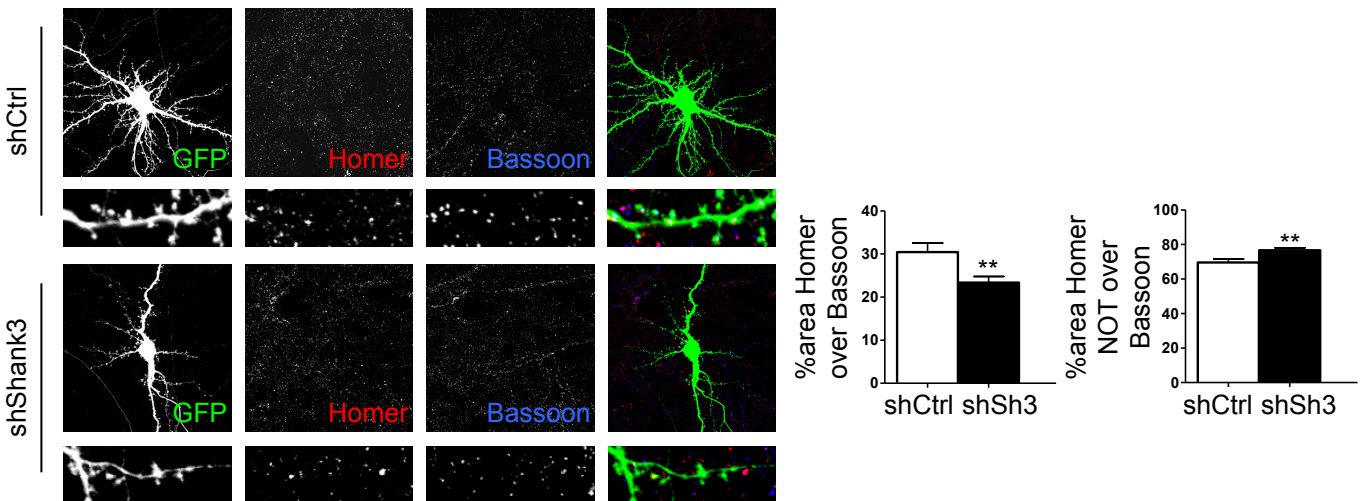

Supplement: NIHMS66921-supplement-SupFig4.pdf [file NIHMS66921-supplement-SupFig4.pdf]
